# Supplementary material for: Long Noncoding RNA lncMUMA Reverses Established Skeletal Muscle Atrophy following Mechanical Unloading
Source: PubMed Central journal article supplement (PMC6225098; doi:10.1016/j.ymthe.2018.09.014), 2018-10-25
Supplement: mmc1.pdf [file mmc1.pdf]

YMTHE, Volume 26

## **Supplemental Information**

**Long Noncoding RNA IncMUMA Reverses**

**Established Skeletal Muscle Atrophy**

**following Mechanical Unloading**

**Zong-Kang Zhang, Jie Li, Daogang Guan, Chao Liang, Zhenjian Zhuo, Jin Liu, Aiping Lu, Ge Zhang, and Bao-Ting Zhang**

>AK014246

TTTGTACATGACAGTTGTATACCTTTCTCTTGTATCTGACACAAAACCTATGATAAAT  
ACTCAAACAATCCCGACTGGATCGAGGAACCATGTATGGGGTAGACTTTTGTATTAA  
GAGCCAAGAAAGGGAGCTTACGAATCATGTTTCCTACGTTTTTATACTGTTTGTTTTA  
AACGGCAGCCCTGCCAGTGGGTTTCAGCTTTTCTAGGAAGTGAATGTCAGTACTGG  
TGTTTTCTATAGGAATGGAGAAGCCATGTATACACTGTGTAAATGCTCATGTGAGAA  
TGACCTAGCGGCACAATCTGACTTGCCTTGGCCTCTGGCCTTCCGGTTACTGTTTTT  
GGCAGCTCTCTACCTTCCTCTATCCTCAAACCTTGTGCCTGTAGCTTTGACTTC  
AGCTCCCAGGGATAGGAACAGACCTAGTGAACATTCCACGGTGCCTGATCTCGCTG  
GCAACTGAGTCCAGCTAGGGCCTGACCCAGCGTCAGTCTCAAAGCTCTGCTTCC  
GGATTCAAACACTGGCGTGAGGGGCAGTAGTCAGCACTTCTAGATCACCATCTAG  
TGAGTCGCTGGTGTAGAGTGAACTTTTACTGCACACTAAGGGCTCACAATTAATA  
AACCAGAATAGCTTTTTGCTCATGGTAACCAAGTTCAGTGTCTGTGGGGCCACAG  
CCTGGCAGGTCTGGCCCAGTCTCTGTACCTGCTGTGGGAGATGGACCGTTTGA  
CCTCTCTGGAGGCTGAGACCCCATACCTGCTGCTCAGTGCTGGTAATCAGCCCTCC  
CCAGAGTGCGTGCCGGCCAGAGGGCTCCACCCACAGTCCCTGGTCATGTACGCAC  
ATCACACTCTTCCTGCCTCTGCACTATGAAAACCATACTGGGAGTTTTAGAAGTGCT  
CACTCTTGTACGAGTGTCTGCGGACATGTGTAAAATAAACGTTAAACTCTGCTTCG

**Figure S1 Sequence of IncMUMA**

**Table S1 Top 50 down-regulated and top 50 up-regulated lncRNAs in HLS muscle tissues**

| No.                           | Gene Name             | Fold Change | No. | Gene Name | Fold Change | No.                         | Gene Name | Fold Change | No. | Gene Name | Fold Change |
|-------------------------------|-----------------------|-------------|-----|-----------|-------------|-----------------------------|-----------|-------------|-----|-----------|-------------|
| Top 50 Down-regulated lncRNAs |                       |             |     |           |             | Top 50 Up-regulated lncRNAs |           |             |     |           |             |
| 1                             | AK014246<br>(lncMUMA) | 21.7411     | 26  | AK019096  | 3.950669    | 1                           | AK133680  | 18.32983    | 26  | AK142736  | 3.894358    |
| 2                             | LOC100046151          | 12.95444    | 27  | Gm2710    | 3.931119    | 2                           | AK006720  | 16.05375    | 27  | AK050117  | 3.80183     |
| 3                             | 1600014K23Rik         | 10.90429    | 28  | Gm8709    | 3.917914    | 3                           | AK010427  | 14.75385    | 28  | AK080530  | 3.772047    |
| 4                             | LOC101056557          | 9.30606     | 29  | AK164498  | 3.917582    | 4                           | AK008861  | 10.43807    | 29  | AK048321  | 3.739837    |
| 5                             | AK019626              | 8.573749    | 30  | AK004808  | 3.782735    | 5                           | AK037838  | 8.354839    | 30  | AK018045  | 3.690979    |
| 6                             | AK040479              | 8.236479    | 31  | AK090094  | 3.758475    | 6                           | AK050666  | 8.166809    | 31  | AK005231  | 3.687683    |
| 7                             | AK088055              | 7.813218    | 32  | AK017133  | 3.742424    | 7                           | AK158068  | 6.773596    | 32  | AK041461  | 3.684211    |
| 8                             | AK140828              | 6.713292    | 33  | AK137267  | 3.695415    | 8                           | AK172445  | 6.474126    | 33  | AK002372  | 3.6197      |
| 9                             | AK089627              | 5.625397    | 34  | AK008597  | 3.643666    | 9                           | AK003280  | 5.942007    | 34  | AK011222  | 3.550058    |
| 10                            | LOC636901             | 5.614903    | 35  | AK038180  | 3.630421    | 10                          | AK172311  | 5.595007    | 35  | AK012252  | 3.533306    |
| 11                            | Gm15453               | 5.529144    | 36  | Gm5396    | 3.613182    | 11                          | AK165502  | 5.37358     | 36  | AK003389  | 3.495472    |
| 12                            | Gm10052               | 5.313084    | 37  | AK141617  | 3.575356    | 12                          | AK003454  | 5.304729    | 37  | AK003573  | 3.388748    |
| 13                            | AK137307              | 5.281147    | 38  | AK156638  | 3.568095    | 13                          | AK013490  | 5.049814    | 38  | AK172322  | 3.379735    |
| 14                            | 0610009O20Rik         | 5.116497    | 39  | AK132982  | 3.560905    | 14                          | AK142700  | 4.890915    | 39  | AK135737  | 3.37448     |
| 15                            | LOC100045968          | 4.969623    | 40  | Gm6498    | 3.549732    | 15                          | AK172626  | 4.823841    | 40  | AK162281  | 3.347527    |
| 16                            | AK032367              | 4.934769    | 41  | AK043296  | 3.522517    | 16                          | AK004150  | 4.691858    | 41  | AK013679  | 3.311203    |
| 17                            | AK138117              | 4.755483    | 42  | Gm5506    | 3.476566    | 17                          | AK002796  | 4.390714    | 42  | AK087626  | 3.261159    |
| 18                            | AK075592              | 4.485645    | 43  | Gm13277   | 3.436207    | 18                          | AK038876  | 4.381345    | 43  | AK136079  | 3.226031    |
| 19                            | AK033909              | 4.429835    | 44  | AK039307  | 3.397279    | 19                          | AK002224  | 4.353103    | 44  | AK136295  | 3.191652    |
| 20                            | AK087321              | 4.341787    | 45  | AK036353  | 3.363755    | 20                          | AK011347  | 4.26089     | 45  | AK021173  | 3.167185    |
| 21                            | AK146676              | 4.259343    | 46  | AK030937  | 3.34493     | 21                          | AK014372  | 4.121564    | 46  | AK046094  | 3.165406    |
| 22                            | AK028893              | 4.205192    | 47  | AK050744  | 3.313224    | 22                          | AK003535  | 4.115442    | 47  | AK131727  | 3.142544    |
| 23                            | AK088710              | 4.180129    | 48  | AK156875  | 3.288136    | 23                          | AK014142  | 4.054426    | 48  | AK144859  | 3.138059    |
| 24                            | AK157223              | 4.115882    | 49  | Gm5331    | 3.262516    | 24                          | AK005641  | 4.001631    | 49  | AK013681  | 3.101982    |
| 25                            | AK034076              | 4.070582    | 50  | AK081791  | 3.238565    | 25                          | AK084371  | 3.95384     | 50  | AK016405  | 3.094581    |

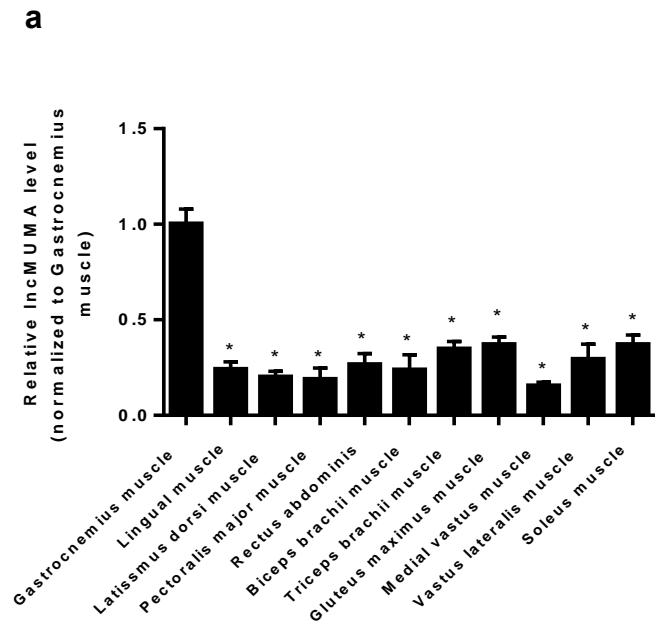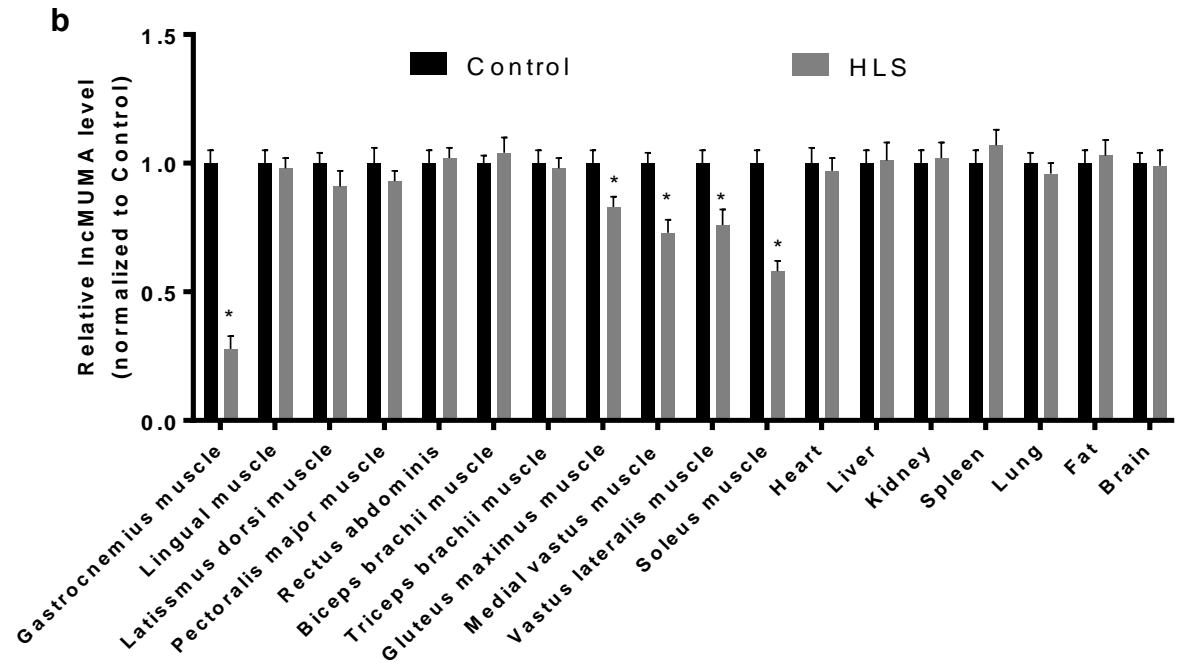

**Figure S2 lncMUMA was highly expressed in gastrocnemius muscle and didn't significantly alter in forelimb muscles and other tissue/organs after HLS. (a) Real-time PCR analysis of lncMUMA levels in different skeletal muscles of mice. \*  $P < 0.05$  vs. Gastrocnemius muscle. (b) Real-time PCR analysis of lncMUMA levels in different skeletal muscles and other tissue/organs of mice with or without HLS treatment.  $n = 10$ . Data are presented as mean  $\pm$  SEM. \*  $P < 0.05$  vs. Control.**

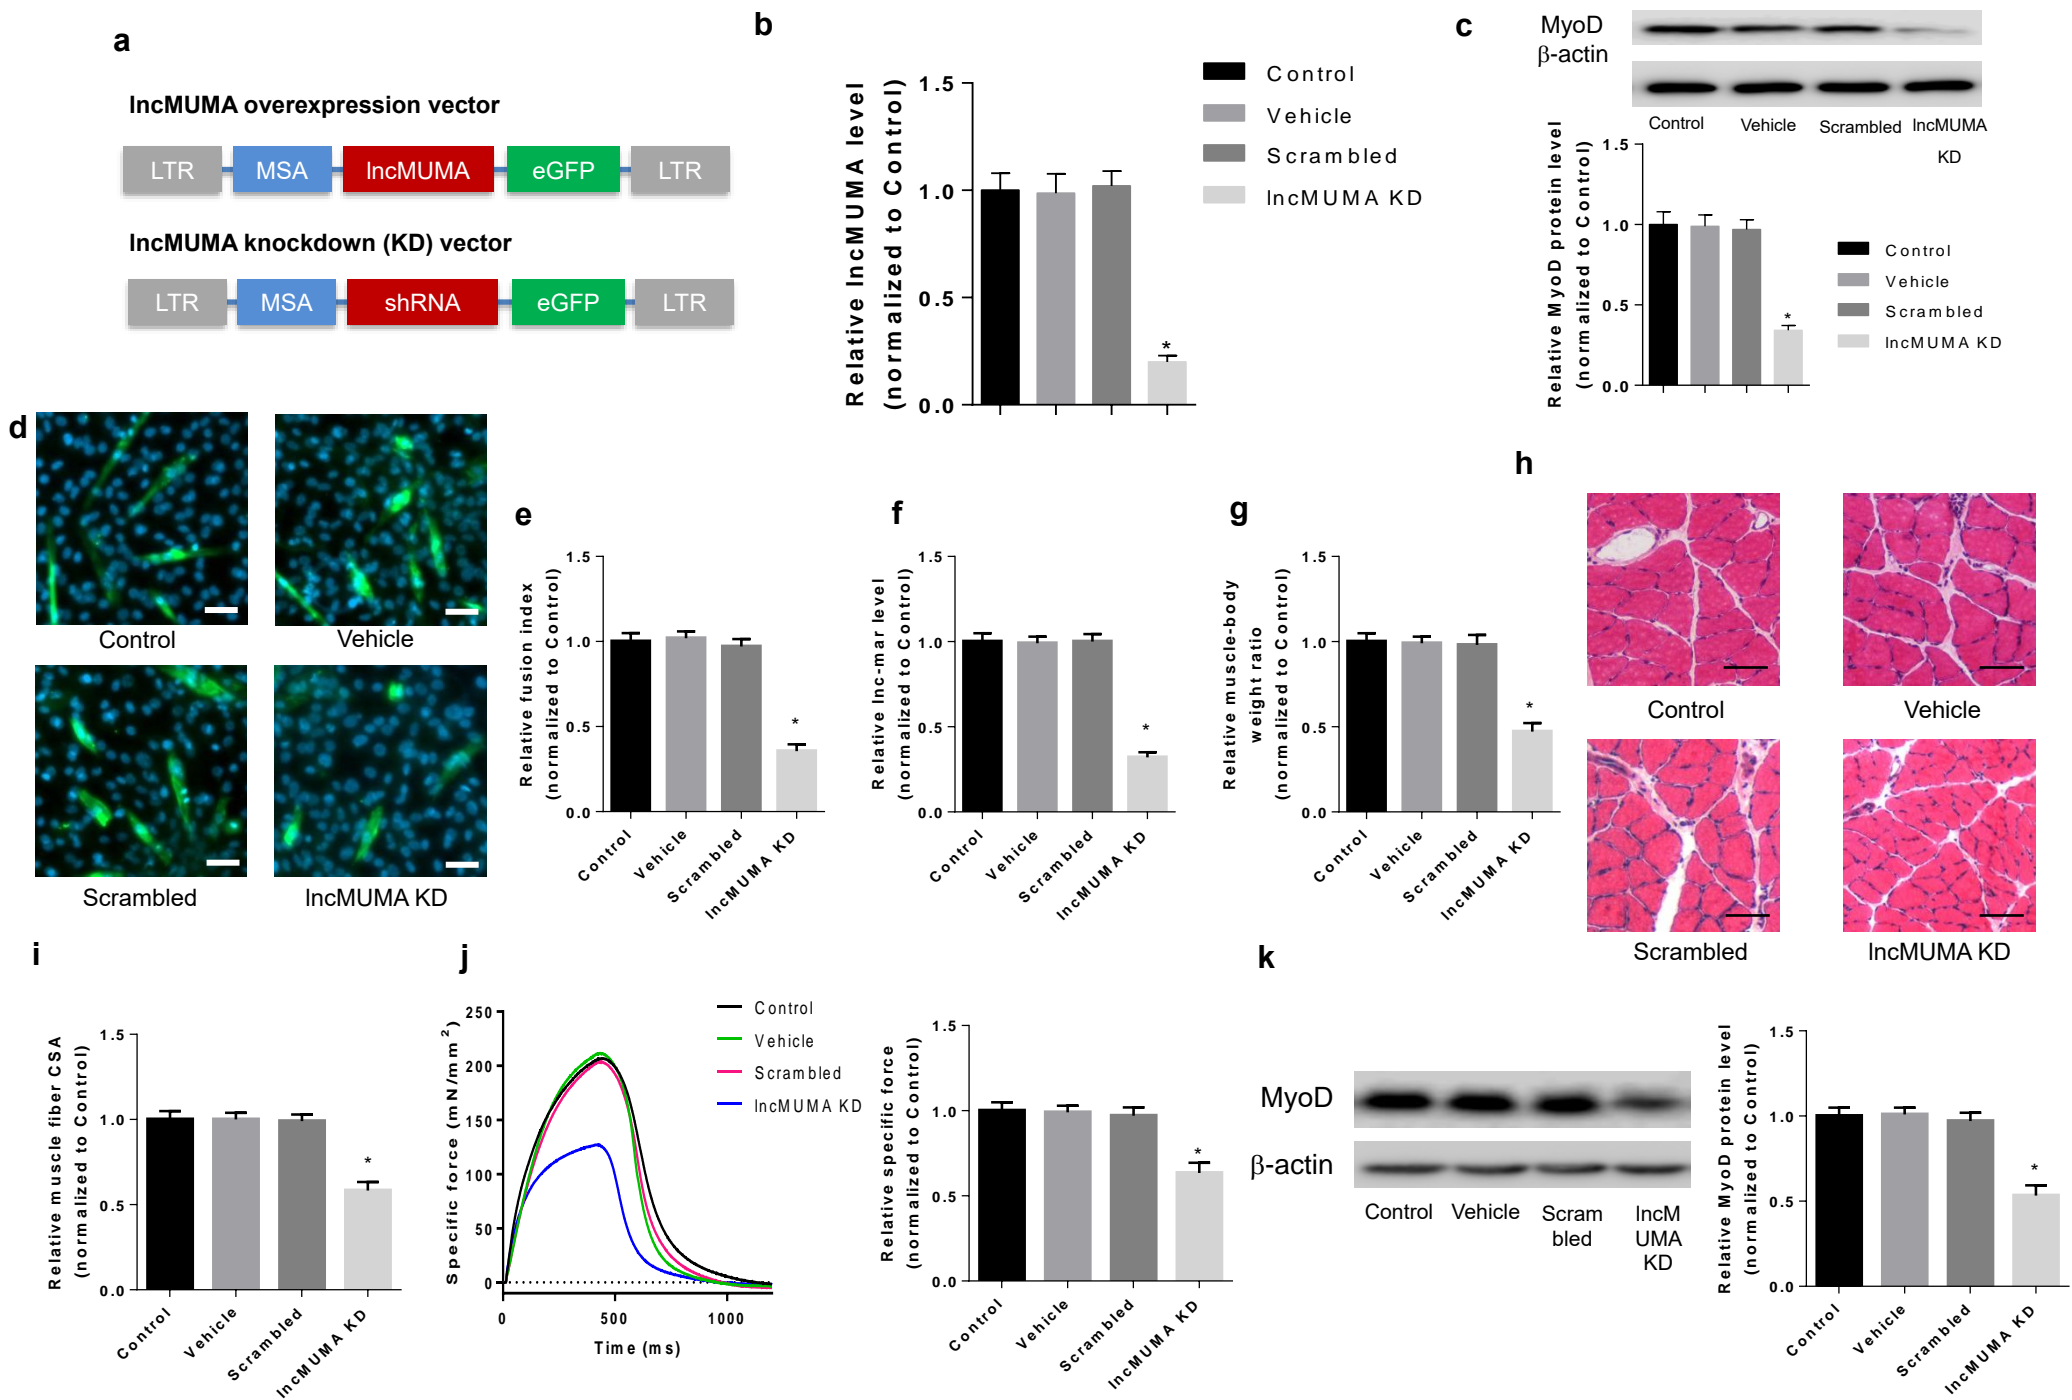

**Figure S3 LncMUMA silencing decreased the myogenesis in C2C12 myoblasts *in vitro* and decreased muscle mass/structure/strength in adult mice.** (a) Schematic of LncMUMA overexpression and knockdown lentiviral vector for viral preparation, respectively. (b) Real-time PCR analysis of LncMUMA levels in C2C12 cells transduced with lentivirus constructed with either scrambled shRNA or LncMUMA knockdown (KD) vector on Day 7 of differentiation under normal gravity culture environment. (c) Western blot analysis of MyoD protein level in lentivirus transduced C2C12 cells on Day 7 of differentiation under normal gravity culture environment. (d) Representative images of C2C12 cells transduced with lentivirus on Day 7 of differentiation under normal gravity culture environment. Myosin was labeled with green fluorescence, and the nuclei were labeled with DAPI. Scale bar=50  $\mu$ m. (e) The fusion index in lentivirus transduced C2C12 cells on Day 7 of differentiation under normal gravity culture environment. (f) Real-time PCR analysis of LncMUMA level in soleus muscle of mice treated with lentivirus with EV and LncMUMA KD vector, respectively. (g-i) Gastrocnemius muscle-to-body weight ratio (g), cross-sections from mid-belly gastrocnemius muscle (h) and muscle fiber CSA (i) in mice treated with lentivirus with scrambled shRNA and LncMUMA KD vector, respectively. Scale bar= 50  $\mu$ m. (l) *In vitro* muscle function testing of specific force in gastrocnemius muscle of mice treated with lentivirus with scrambled shRNA and LncMUMA KD vector, respectively. (J) Expression of MyoD protein in gastrocnemius muscle of mice treated with lentivirus with scrambled shRNA and LncMUMA KD vector, respectively. n=5 for *in vitro* and n=10 for *in vivo*. U6 small nuclear RNA is used as the endogenous control of lncRNA.  $\beta$ -actin is used as the endogenous control for protein. Data are presented as mean  $\pm$  SEM. \*  $P < 0.05$  vs. Control.

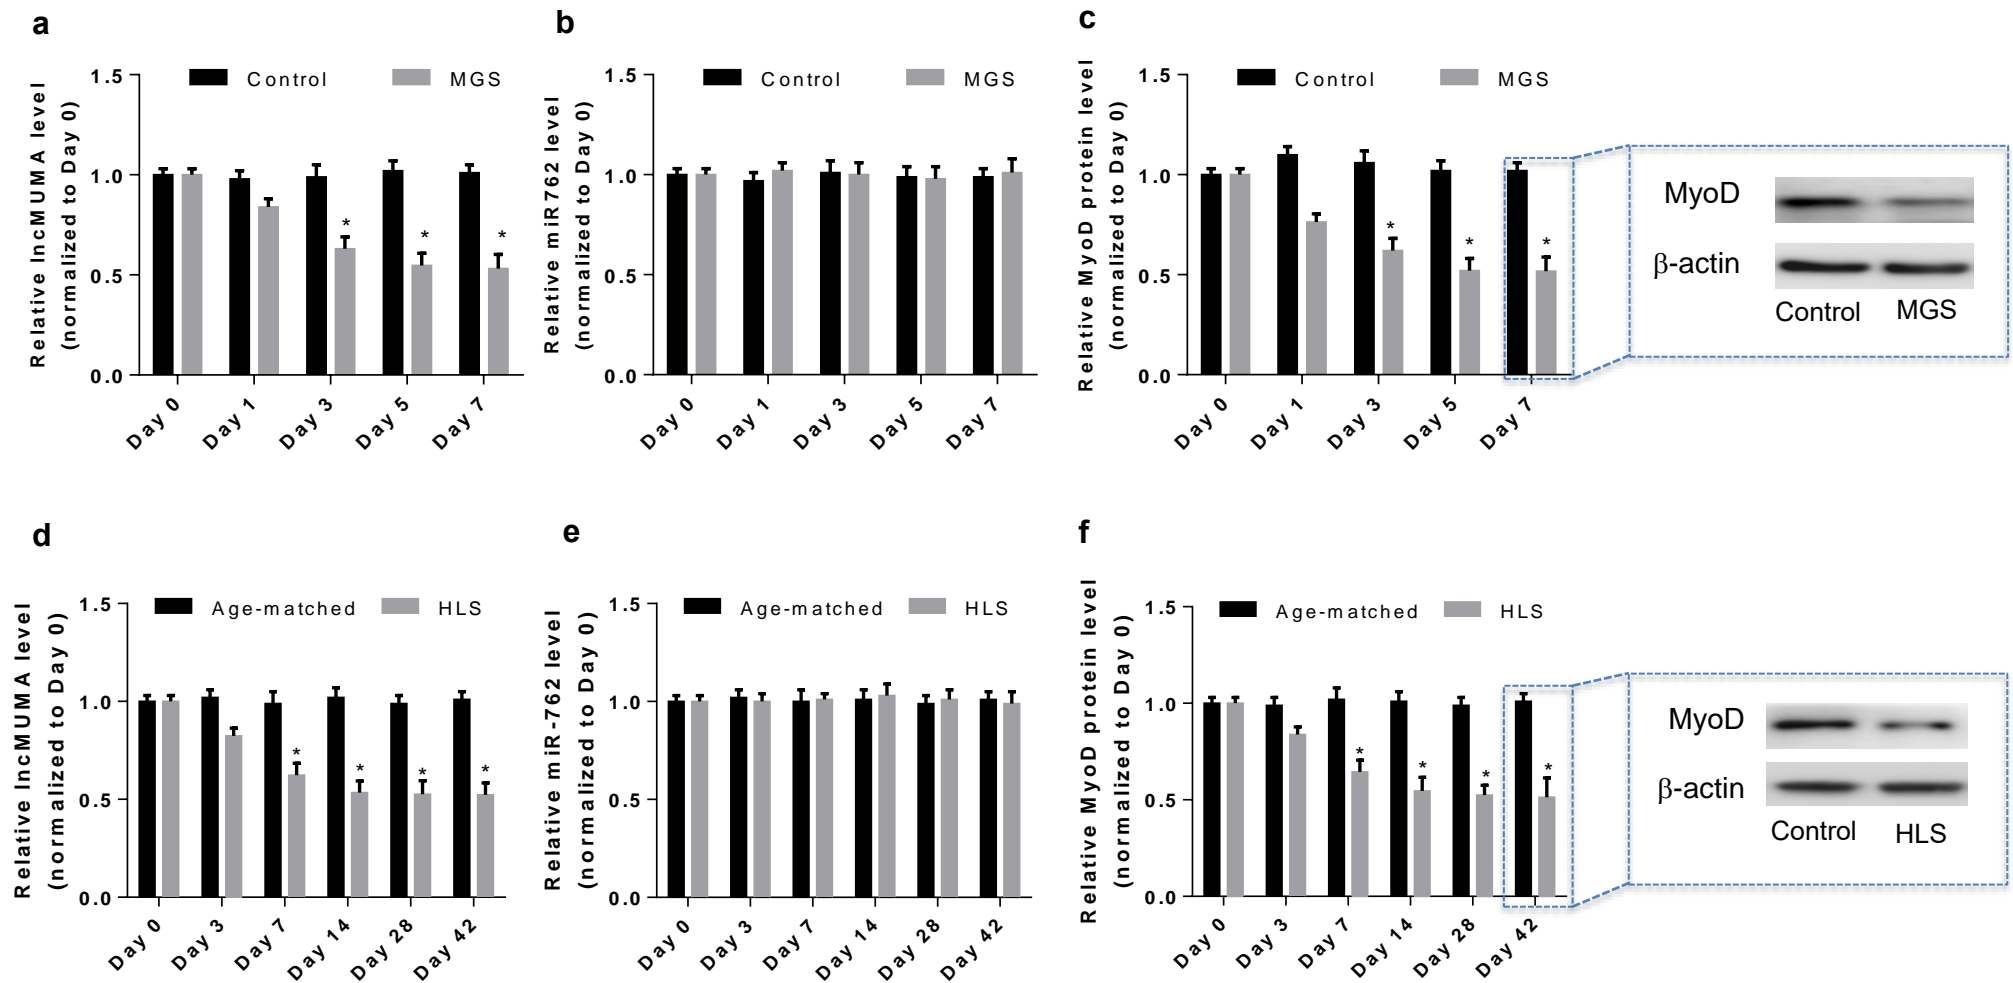

**Figure S4 Reduced MyoD expression associated with decreased IncMUMA expression, without changes of miR-762, in microgravity-simulated (MGS) C2C12 myoblasts *in vitro* and in muscle tissues of hindlimb suspension (HLS) mice.** (a) Real-time PCR analysis of IncMUMA levels in C2C12 cells with either normal gravity (Control) or MGS culture environment on Day 0, 1, 3, 5 and 7 of differentiation. (b) Expression level of miR-762 in C2C12 cells of each group at each time point. (c) (left) Expression level of MyoD protein in C2C12 cells of each group at each time point. (right) Representative western blot images of MyoD protein in C2C12 cells on Day 7 of differentiation. (d) Expression level of IncMUMA in gastrocnemius muscle of either healthy adult (Control) or HLS mice on Day 0, 3, 7, 14, 28 and 42 of HLS. (e) Expression level of miR-762 in gastrocnemius muscle of each group at each time point. (f)(left) Expression level of MyoD protein in gastrocnemius muscle of each group at each time point. (right) Representative western blot images of MyoD protein in gastrocnemius muscle of either Control or HLS mice on Day 42 of HLS.  $n=5$  (*in vitro*) and 10 (*in vivo*) at each time point for each group. U6 small nuclear RNA is used as the internal control of lncRNA and miRNA.  $\beta$ -actin is used as the control for protein. Data are presented as mean  $\pm$  SEM. \* $P<0.05$  vs. Corresponding Day 0.

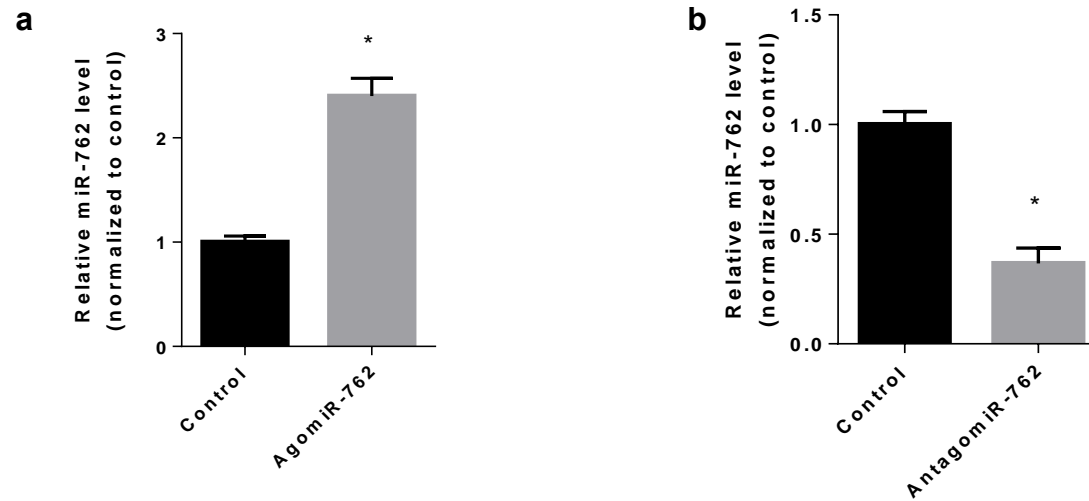

**Figure S5 AgomiR-762 and AntagomiR-762 regulated the expression level of miR-762 in C2C12 myoblasts *in vitro*.** Real-time PCR analysis of miR-762 level in C2C12 cells treated with AgomiR-762 (a) and AntagomiR-762 (b). U6 small nuclear RNA is used as the endogenous control. Data are presented as mean  $\pm$  SEM. \*  $P < 0.05$  vs. Control.



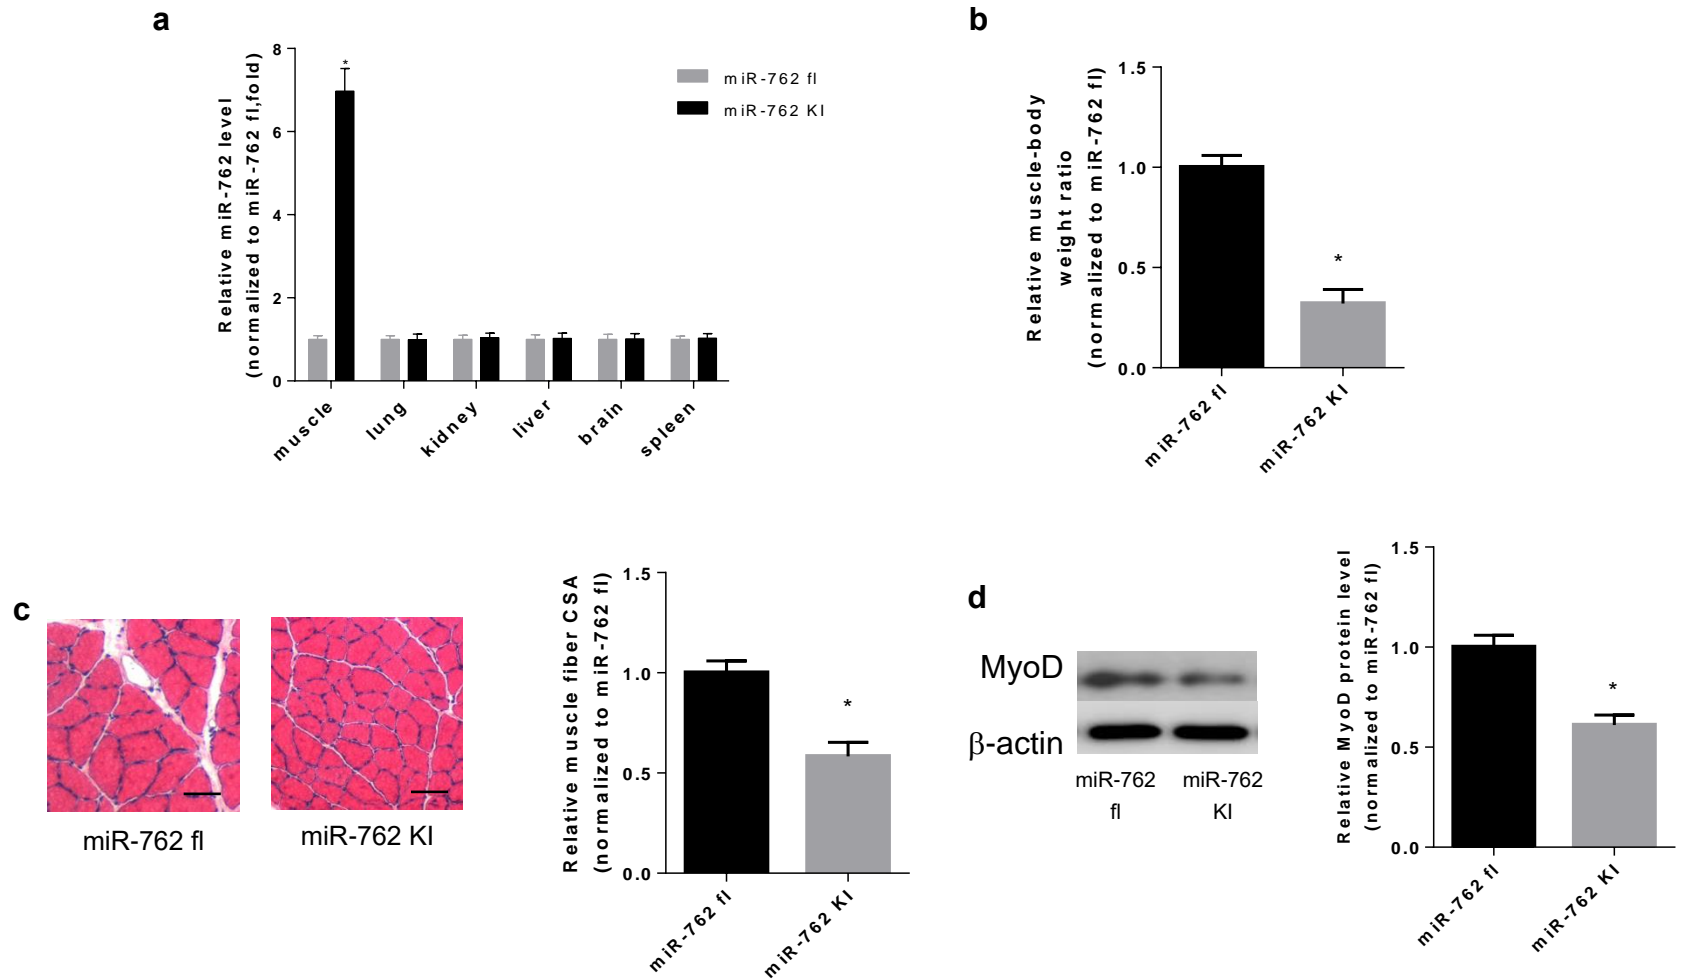

**Figure S6 Phenotype analysis of MyoD expression, muscle mass/structure/function in muscle-specific miR-762 knockin mice.** (a) Real-time PCR analysis showing the miR-762 expression in muscle, lung, kidney, liver, brain and spleen tissues isolated from ROSA26-PCAG-STOP<sup>fllox</sup>-miR-762-eGFP (miR-762 fl) and miR-762 knockin (miR-762 KI) mice, respectively. (b) Gastrocnemius muscle-to-body weight ratio in miR-762 fl and miR-762 KI mice, respectively. (c) Cross-sections from mid-belly gastrocnemius muscle and muscle fiber CSA in miR-762 fl and miR-762 KI mice, respectively. Scale bar= 50 $\mu$ m. (d) Expression level of MyoD protein in gastrocnemius muscle of miR-762 fl and miR-762 KI mice, respectively. n=10 for each group. U6 small nuclear RNA is used as the endogenous control of miRNA.  $\beta$ -actin is used as the endogenous control for protein. Data are presented as mean  $\pm$  SEM. \* $P$ <0.05 vs. miR-762 fl group.

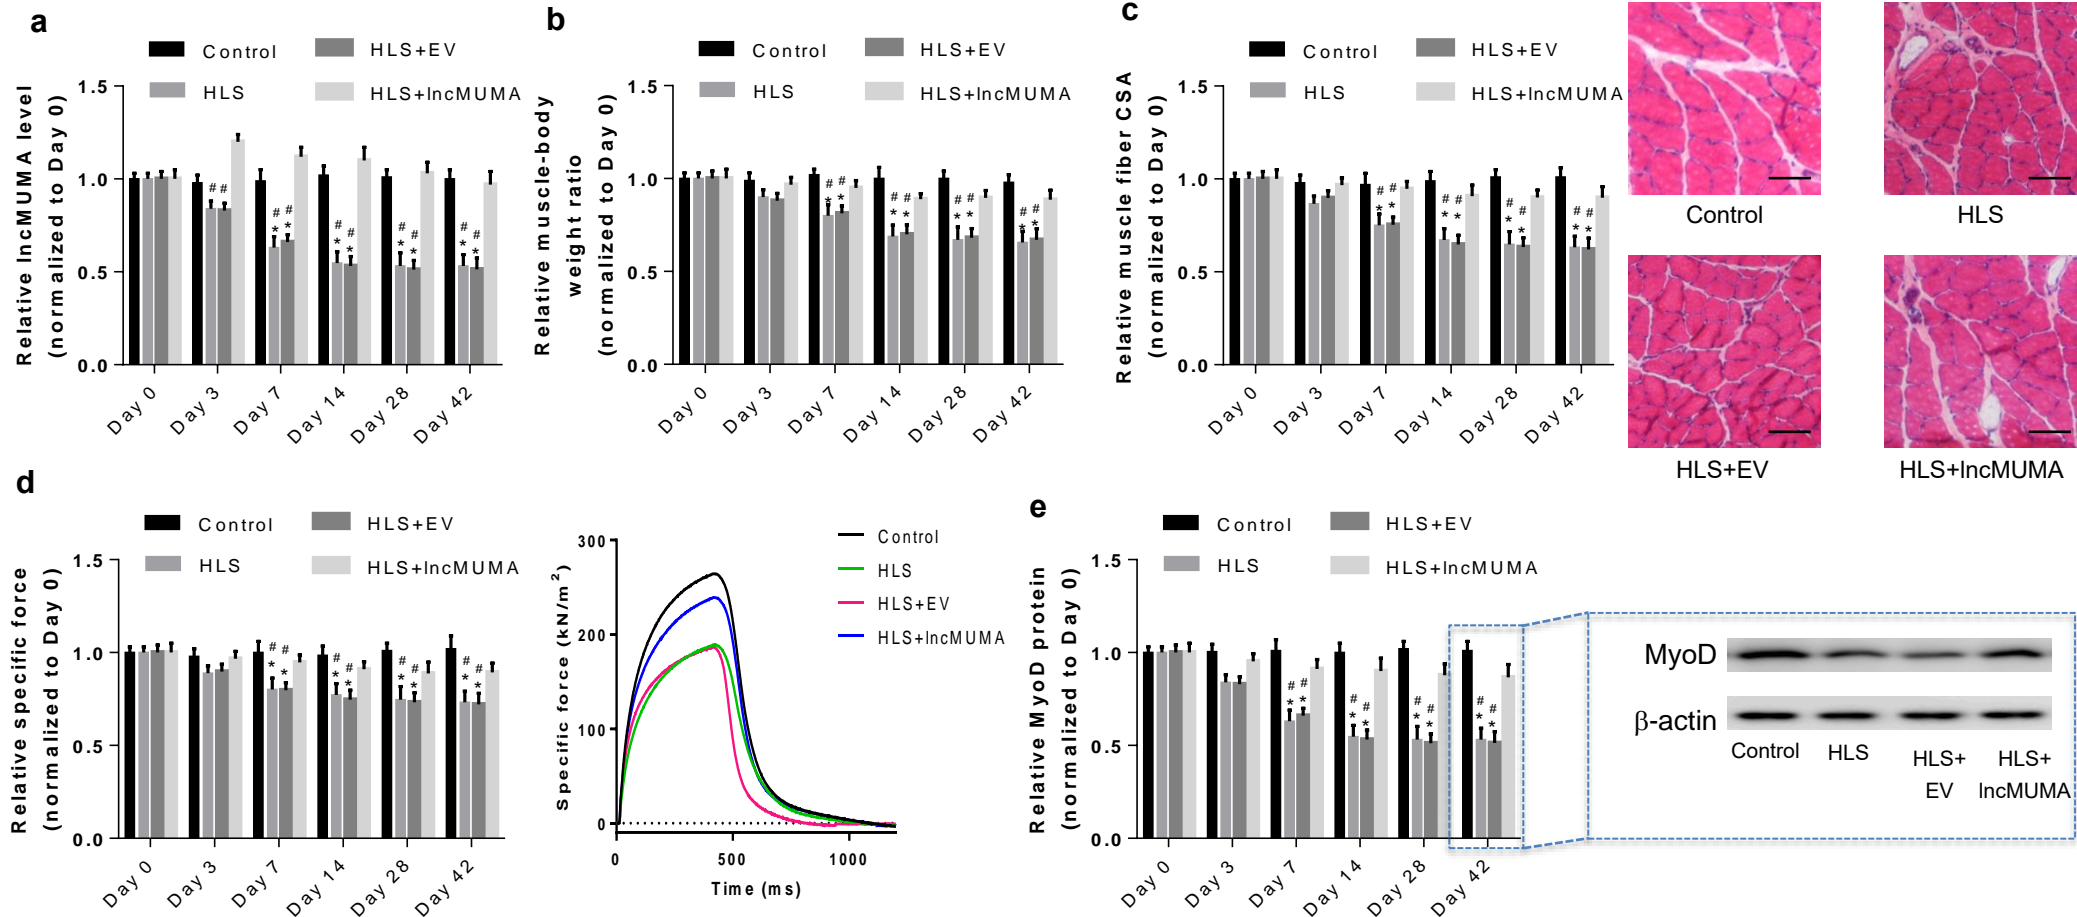

**Figure S7 Skeletal muscle-specific overexpression of IncMUMA before unloading attenuated the decreases of MyoD, muscle mass/structure/function from baseline following mechanical unloading.** (a) Real-time PCR analysis of IncMUMA levels in gastrocnemius muscle of normal control, hindlimb suspension (HLS), HLS+empty vector (EV) and HLS+IncMUMA vector (IncMUMA) mice, respectively, on Day 0, 3, 7, 14, 28 and 42 of HLS. (b) Gastrocnemius muscle-to-body weight ratio in each group at each time point. (c) (left) Gastrocnemius muscle fiber CSA in each group at each time point. (right) Cross-sections from mid-belly gastrocnemius muscle in each group at Day 42 of HLS. Scale bar= 50 $\mu$ m. (d) (left) *In situ* muscle function testing of specific force in gastrocnemius muscle of each group at each time point. (right) Specific force in gastrocnemius muscle of each group at Day 42 of HLS. (e) (left) Expression level of MyoD protein in each group at each time point. (right) Expression level of MyoD protein in gastrocnemius muscle of each group at Day 42 of HLS. n=10 at each time point for each group. U6 small nuclear RNA is used as the internal control of IncRNA.  $\beta$ -actin is used as the control for protein. Data are presented as mean  $\pm$  SEM. \*  $P < 0.05$  vs. Control, #  $P < 0.05$  vs. HLS+IncMUMA.

a

**Sequence of IncMUMA-h in human**

```
>NR_147193.1 Homo sapiens DM1 locus antisense RNA (DM1-AS), long non-coding RNA
GATTTGGGAAGGAGCTCGGAATGGAGCCGCTGGAAGAGGAGACGCGTGCGGGGAGAGGGCCC
GGGCGGGTGCCTGTCCCCTCCACACTTAGTCCCCGCGCCCCGCGGGCGCCTGAGATTGTGAG
CTGGTCCCAGGAGATGTCCGAGGACCTCGGCGCGCCGCCCCAGCAGTGGGCACGGGGGAA
GAGGGCTGGTGGACGGGATGTCCCCGGGAGAGCTGGACTTGCGCCGCCGAGGCCCTCACC
TCTTGACAGGGCGCGCCGCTCCGGCCCCGTCCGGTCCGCTGCGCTGTCGCCGGTTCTTGAACCAG
TTGCTGACCTGCGTGAGCGACAGGCCGGTGTCTATACACGCCCGCGGAGCAGACGGCCCACC
TCCTCCCGGTCTCCGGGGAAGGGGACACATGAGGGACTCACCTGTGGCTCCCTCTGCCTGCA
GCAACTCCATCCGCTCCTGCAACTGCCGGACGTGCCTCTAGGTCCCGGTTCCGAGCCTCTG
CCTCGCGTAGTTGACTGTGGGGAGGTAAGGACGGTGAGTCCGTCGGGCCGGACGAGAGGGG
ATGCCAAGGGTTGCCACCGGCCGCATCCCGGCCCGGCCCGGCCCGATCCCGACCTGGC
GAAGTTCTGGTTGTCCGTGCGGATGGCCTCCATCTCCGGCTCAGGCTCTGCCGGGTGAGCAC
CTCCTCCTCCAGGGCTTCTGGAGCTCCCGCAGCGTCACCTCGGC
```

b

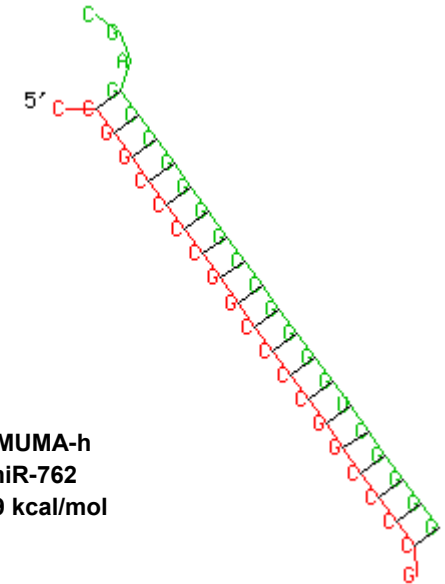

c

```
IncMUMA-h-WT 5' cCGGCCCGGCCCGGCCCGGCCCGg 3'
                |||
miR-762-WT 3' cgaGCCGGGGCCGGGGUCGGGG 5'
IncMUMA-h-Mut 5' cCGUAUAAAUGAGUUAGGCCg 3'
miR-762-Mut 3' cgaGC GAUUA AACACA AUUG 5'
```

d

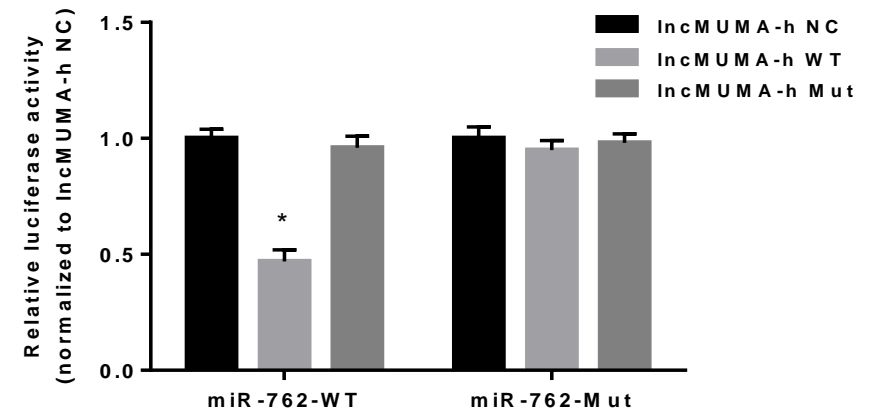

**Figure S8 IncMUMA was functionally conserved in primary human skeletal muscle cells (pHSkMC).** (a) Sequence of IncMUMA in human (IncMUMA-h). (b) Bioinformatic prediction of miR-762 as a target miRNA of IncMUMA-h by RNAhybrid 2.12. mfe: minimum free energy. (c) Sequence of wild type and mutated binding site between miR-762 and IncMUMA-h. (d) Luciferase reporter assay of either wild type miR-762-transfected (miR-762-WT) or mutated miR-762-transfected (miR-762-Mut) pHSkMCs from healthy adults treated with negative control (IncMUMA-h NC), wild type binding site of IncMUMA (IncMUMA-h WT) and mutated binding site of IncMUMA (IncMUMA-h Mut), respectively. n=3. \*  $P < 0.05$  vs. IncMUMA-h NC. Data are presented as mean  $\pm$  SEM.

**Table S2 Primer sequences of lncRNA, miRNA and mRNA**

| <b>Gene</b> | <b>Primer sequences</b>                                                             |
|-------------|-------------------------------------------------------------------------------------|
| lncMUMA     | forward: TTGTA <del>CTTC</del> CAGCTCCCAGGG<br>reverse: CCAGCGACTCACTAGATGGT        |
| miR-762     | forward: ACACGGGGCTGGGGCCGGGGCCGAGCGCCTC<br>reverse: CTCAGGGGCTGGGGCCGGGGCCGAGCCAGA |
| Myod1       | forward: AGTGAATGAGGCCTTCGAGA<br>reverse: GCATCTGAGTCGCCACTGTA                      |
